# Supplementary material for: From branched self-assemblies to branched mesoporous silica nanoribbons
Source: Royal Society of Chemistry journal article supplement (doi:10.1039/b812016a), 2008-01-01
Supplement: b812016a.pdf [file b812016a.pdf]

## From branched self-assemblies to branched mesoporous silica nanoribbons

Baozong Li,<sup>a</sup> Yuanli Chen,<sup>a</sup> Huanyu Zhao,<sup>a</sup> Xianfeng Pei,<sup>a</sup> Lifeng Bi,<sup>a</sup> Kenji Hanabusa<sup>b</sup> and Yonggang Yang<sup>\*a</sup>

<sup>a</sup>Key Laboratory of Organic Synthesis of Jiangsu Province, College of Chemistry and Chemical Engineering, Suzhou (Soochow) University, Suzhou, Jiangsu 215123, China <sup>b</sup>Department of Functional Polymer Science, Faculty of Textile Science and Technology, Shinshu University, Ueda 386-8567, Japan

**Synthesis of compound L-16Phe6PyBr.** A pyridine solution (80 mL) of compound **1** (9.6 g, 17 mmol) was heated at 100 °C for 12 h under a nitrogen atmosphere. The resulted solution was evaporated and the residue was recrystallized twice from ethanol-ether (yield: 9.3 g, 85.3 %). FT-IR (KBr): 3293cm<sup>-1</sup> (ν<sub>N-H</sub>, amide A), 640 cm<sup>-1</sup> (ν<sub>C=O</sub>, amide I), 1534cm<sup>-1</sup> (ν<sub>N-H</sub>, amideII) <sup>1</sup>H-NMR (400MHz, DMSO.d<sub>6</sub>, TMS, 25 °C): δ=0.87 (t, J=6.82Hz, 3H; CH<sub>3</sub>), 1.23 (br, 28H; alkyl), 1.99-2.01 (m, 2H, CONHCH<sub>2</sub>CH<sub>2</sub>), 2.03-2.06 (m, 2H; CH<sub>2</sub>CH<sub>2</sub>CONH), 2.22-2.34 (m, 2H; CH<sub>2</sub>CONH), 3.09-3.11 (m, 2H; CONHCH<sub>2</sub>), 3.13-3.15 (m, 2H, PyCH<sub>2</sub>), 4.64 (q, J=7.8Hz, 1H, PhCH<sub>2</sub>CH), 4.86 (t, J=7.7Hz, 1H; PhH), 6.97 (t, J=5.7Hz, 1H, 3-PhH), 7.16 (m, 2H, 1-PhH), 7.23 (t, J=4.0Hz, 2H; 2-PhH, CONHCH), 7.27 (s, 1H, CONHCH<sub>2</sub>) 7.89 (d, J=8.0Hz, 1H, CONHCH), 8.09 (t, J=7.2Hz, 2H; 3-PyH), 8.43 (t, J=7.8Hz, 1H, 4-PhH), 9.53 (d, J=5.5Hz, 2H, 2-PyH). Elemental analysis calcd(%); C, 67.06; H, 9.07; N, 6.52. found: C, 66.0; H, 9.06; N, 6.27.

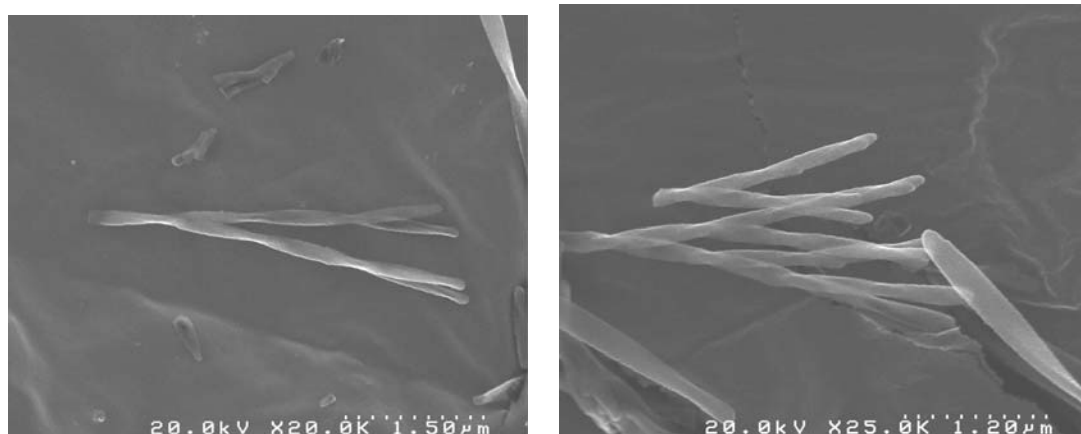

**Figure S1.** FESEM images of branched mesoporous silica nanoribbons.

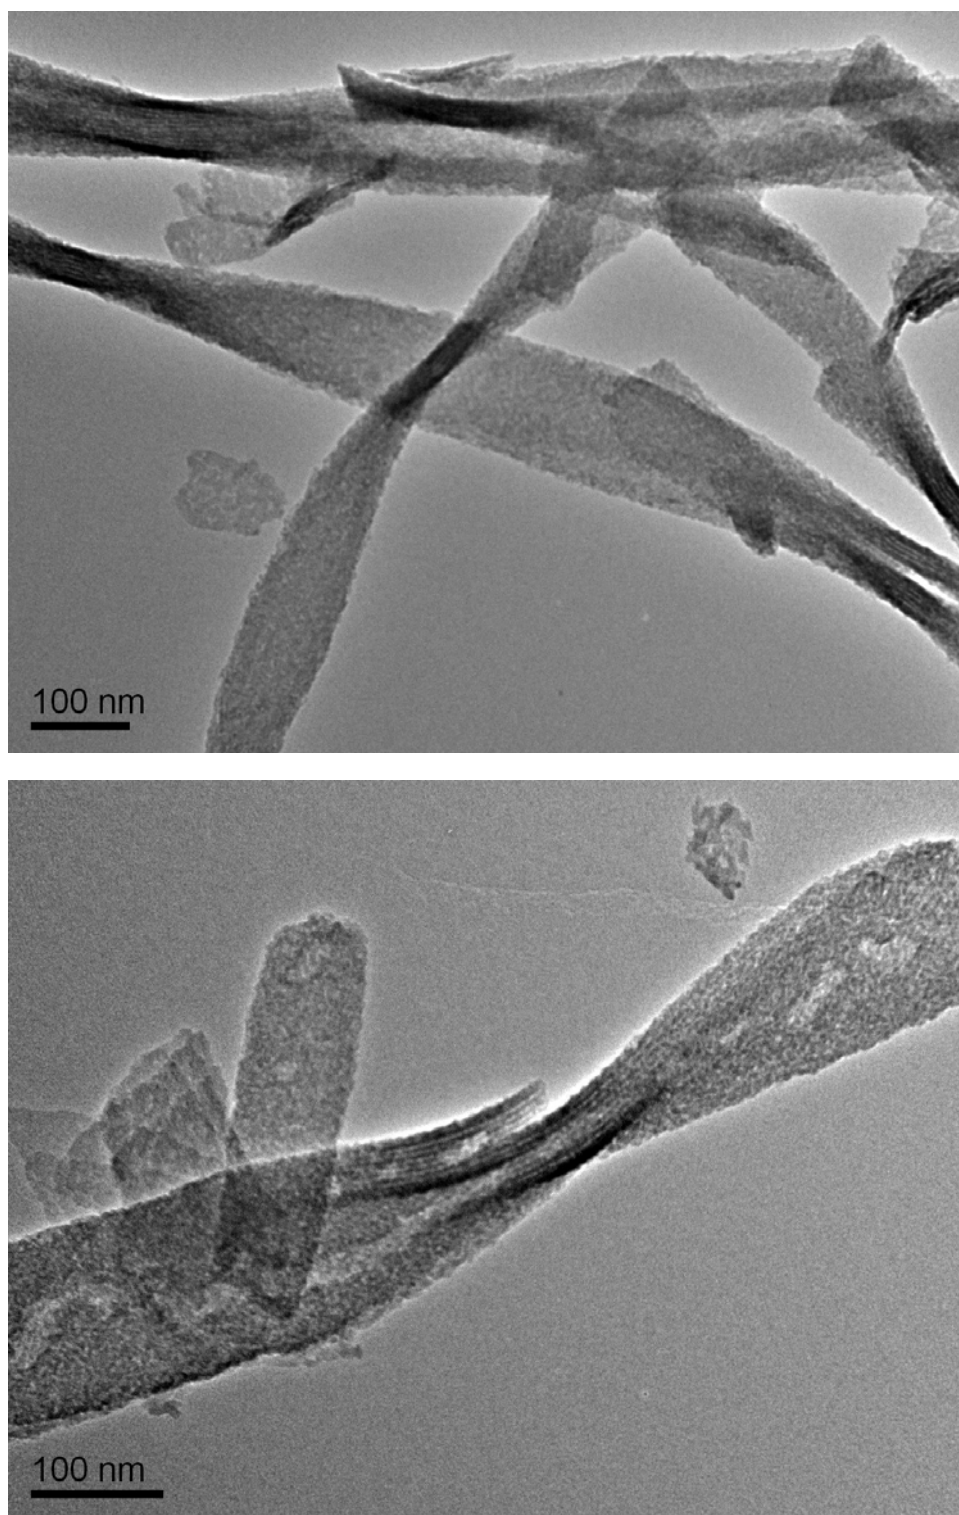

**Figure S2.** TEM images of branched mesoporous silica nanoribbons.

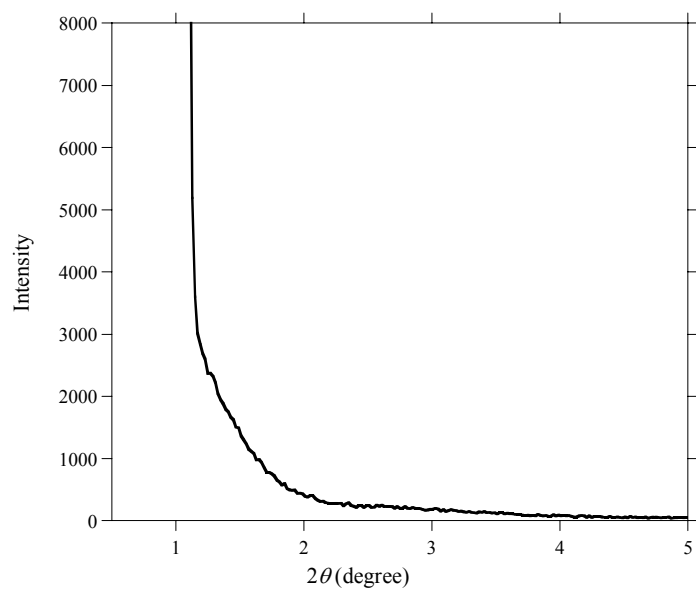

**Figure S3.** SAXRD patterns of the calcined mesoporous silica nanoribbons.

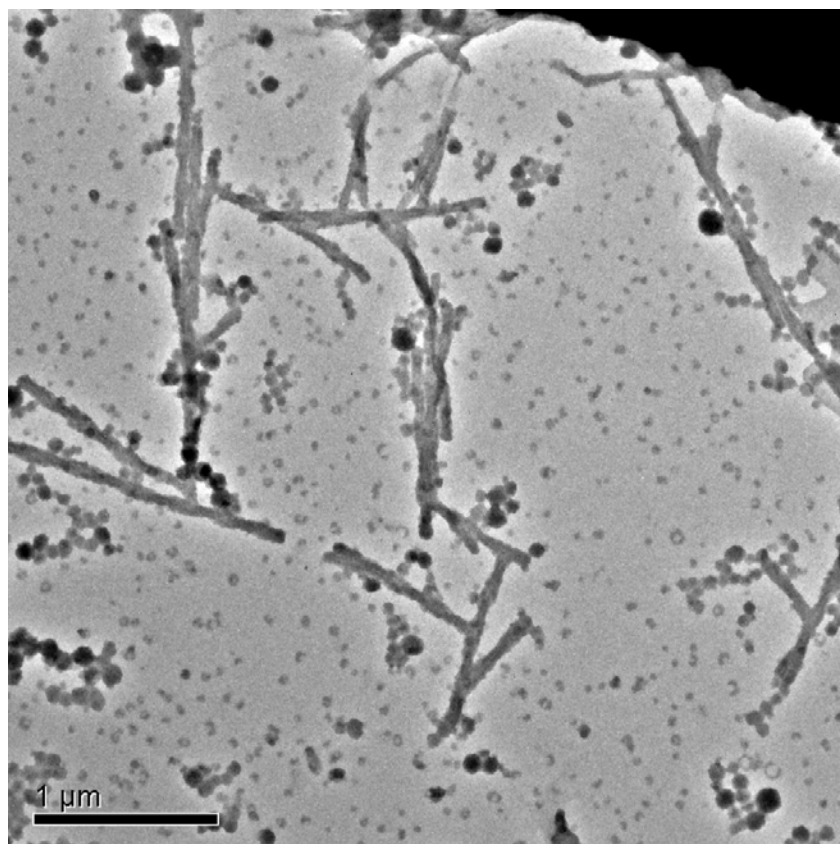

**Figure S4.** TEM images of the reaction mixture at 160 s.
